# 1 **Magnesium increases homoeologous crossover frequency in *ZIP4*** 2 **(*Ph1*) mutant wheat-wild relative hybrids**

3 María-Dolores Rey<sup>1\*</sup>, Azahara C. Martín<sup>1</sup>, Mark Smedley<sup>1</sup>, Sadiye Hayta<sup>1</sup>, Wendy Harwood<sup>1</sup>, Peter Shaw<sup>2</sup>, and  
4 Graham Moore<sup>1</sup>

5 <sup>1</sup>Department of Crop Genetics, <sup>2</sup> Department of Cell and Developmental Biology, John Innes Centre, Norwich  
6 Research Park, Norwich, UK.

7 **\*Corresponding author:** María-Dolores Rey (email: mdoloresrey@ias.csic.es)

8 **Keywords:** wheat, wild relatives, Magnesium, *Ph1* locus, *TaZIP4-B2*, homoeologous crossover, CRISPR/Cas9  
9 system

10 Total word count: 8652

11 Title: 12

12 Summary: 282

13 Introduction: 693

14 Materials and Methods: 1401

15 Results: 1991

16 Discussion: 1074

17 Number of tables: 4

18 Number of figures: 3

19 Number of supplementary tables: 2

20 Number of supplementary figures: 2

21

## 22 **Acknowledgements**

23 The authors thank Ali Pendle (John Innes Centre, UK) for her valuable comments in the writing of the manuscript.

24 This work was supported by the UK Biotechnology and Biological Research Council (BBSRC), through a grant  
25 part of the Designing Future Wheat (DFW) Institute Strategic Programme (BB/P016855/1), three grants (Grant  
26 BB/J004588/1; Grant BB/M009599/1; Grant BB/J007188/1); and by a Marie Curie Fellowship Grant (H2020-  
27 MSCA-IF-2015-703117).

28 **Abstract**

29 Wild relatives provide an important source of useful traits in wheat breeding. Wheat and wild relative hybrids  
30 have been widely used in breeding programs to introduce such traits into wheat. However, successful introgression  
31 is limited by the low frequency of homoeologous crossover (CO) between wheat and wild relative chromosomes.  
32 Hybrids between wheat carrying a 70Mb deletion on chromosome 5B (*ph1b*) and wild relatives, have been  
33 exploited to increase the level of homoeologous CO, allowing chromosome exchange between their  
34 chromosomes. In *ph1b*-rye hybrids, CO number increases from a mean of 1 CO to 7 COs per cell. CO number  
35 can be further increased up to a mean of 12 COs per cell in these *ph1b* hybrids by treating the plants with Hoagland  
36 solution. More recently, it was shown that the major meiotic crossover gene *ZIP4* on chromosome 5B (*TaZIP4-*  
37 *B2*) within the 70Mb deletion, was responsible for the restriction of homoeologous COs in wheat-wild relative  
38 hybrids, confirming the *ph1b* phenotype as a complete *Tazip4-B2* deletion mutant (*Tazip4-B2 ph1b*). In this study,  
39 we have identified the particular Hoagland solution constituent responsible for the increased chiasma frequency  
40 in *Tazip4-B2 ph1b* mutant-rye hybrids and extended the analysis to *Tazip4-B2* TILLING and CRISPR mutant-*Ae*  
41 *variabilis* hybrids. Chiasma frequency at meiotic metaphase I, in the absence of each Hoagland solution  
42 macronutrient (NH<sub>4</sub> H<sub>2</sub>PO<sub>4</sub>, KNO<sub>3</sub>, Ca (NO<sub>3</sub>)<sub>2</sub>·4H<sub>2</sub>O or Mg SO<sub>4</sub>·7H<sub>2</sub>O) was analysed. A significant decrease in  
43 homoeologous CO frequency was observed when the Mg<sup>2+</sup> ion was absent. A significant increase of  
44 homoeologous CO frequency was observed in all analysed hybrids, when plants were irrigated with a 1mM Mg<sup>2+</sup>  
45 solution. These observations suggest a role for magnesium supplementation in improving the success of genetic  
46 material introgression from wild relatives into wheat.

47

48

49

50

51

52

53

54

## 55 Introduction

56 Despite possessing related ancestral genomes (genome AABBDD), bread wheat behaves as a diploid during  
57 meiosis. Deletion of chromosome 5B in tetraploid and hexaploid wheat results in a level of incorrect chromosome  
58 pairing and exchange, visualised as a low level of multivalents at metaphase I, and homoeologous crossovers  
59 (COs) between related chromosomes in wheat-wild relative hybrids (Riley and Chapman, 1958; Sears and  
60 Okamoto, 1958). From these observations, it was proposed that chromosome 5B carries a locus termed *Pairing*  
61 *homoeologous 1* (*Ph1*), which evolved on wheat's polyploidisation and restricted chromosome pairing and COs  
62 to true homologues (Riley and Chapman, 1958). A hexaploid wheat cv. Chinese Spring (CS) line carrying a 70Mb  
63 deletion on the long arm of chromosome 5B (*ph1b*) has been exploited over the last 40 years to allow exchange  
64 between wild relative and wheat chromosomes. Recently, it was shown that on wheat's polyploidisation, a  
65 segment of 3B carrying the major crossover gene *ZIP4* and a block of heterochromatin, duplicated and inserted  
66 between two *CDK2*-like genes within a cluster of *CDK2-like* and methyl-transferase genes (Griffiths et al., 2006;  
67 Al-Kaff et al., 2008; Martín et al., 2014, 2017). Using exploitation of TILLING mutants, it was shown that the  
68 duplicated *ZIP4* gene (*TaZIP4-B2*) within this cluster, both promotes homologous CO and restricts homoeologous  
69 CO (Rey et al., 2017). Therefore, *TaZIP4-B2* within the 70Mb *ph1b* deletion region is responsible for the effect  
70 on homoeologous CO in wheat-wild relative hybrids, and as such the *ph1b* line can be described as a complete-  
71 deletion (or complete loss-of-function) mutant of *Tazip4-B2* (*Tazip4-B2 ph1b* mutant). In terms of the effect on  
72 chromosome synapsis/pairing, cell biological studies reveal that the *ph1b* deletion in wheat has little effect, with  
73 most synapsis occurring during clustering of the telomeres as a bouquet. Furthermore, in wheat-wild relative  
74 hybrids, which only possess homoeologues, the *ph1b* deletion also has little effect on the level of synapsis, except  
75 that most pairing occurs after dispersal of the telomere bouquet. In wheat itself, a few chromosomes also undergo  
76 delayed pairing until after dispersal of the bouquet, with the subsequent incorrect pairing leading to the low level  
77 of multivalents observed at metaphase I (Martín et al., 2014, 2017).

78 For the last 40 years, the wheat CS *ph1b* deletion line has been exploited in crosses with wild relatives to allow  
79 exchange between chromosomes at meiosis. As indicated previously, in these hybrids, the extent of chromosome  
80 synapsis is similar whether the line carries the *ph1b* deletion or not. Moreover, on the synapsed chromosomes,  
81 similar numbers of MLH1 sites (normally a marker for CO), are observed (Martín et al., 2014). However  
82 significant site CO frequency is only observed in those hybrids carrying the *ph1b* deletion. However even in this  
83 case, the frequency of resulting COs still does not reflect the number of available MLH1 sites (Martín et al., 2014).

84 This implies that there is potential for increased processing of MLH1 sites into COs. Fortuitously, it has been  
85 observed that a nutrient solution (Hoagland's solution) added to the soil when *Tazip4-B2 ph1b* mutant-rye hybrids  
86 are growing resulted in increased CO frequency, although it was not known which nutrient component was  
87 responsible for the effect.

88 Mineral elements are essential nutrients for plants to complete their life cycle. They are classified into macro and  
89 micronutrients, which are required in relatively large and small amounts, respectively (Hoagland and Arnon,  
90 1950). The importance of each of these macronutrients has been reported in numerous physiological processes,  
91 such as plant growth, cell division, and metabolism (Huber, 1980; Maathius, 2009). However, limited studies have  
92 been performed as to their effect on meiosis. Early studies have previously reported that alterations of external  
93 factors, such as temperature, or nutrient composition, can produce profound effects on chiasma frequency (Grant,  
94 1952; Wilson, 1959; Law, 1963; Bennet and Ress, 1970; Fedak, 1973).

95 The main objective of the present study was to determine whether a specific macronutrient present in the Hoagland  
96 solution was responsible for the observed increased homoeologous CO frequency in *Tazip4-B2 ph1b* mutant-rye  
97 hybrids described in Martín et al., (2017). We also analysed whether this macronutrient increased homoeologous  
98 CO frequency in each of the *Tazip4-B2 ph1b* (complete deletion), TILLING (point mutation) and CRISPR (partial  
99 deletion) mutant-*Ae. variabilis* hybrids.

100

## 101 **Materials and methods**

### 102 **Plant material**

103 Plant material used in this study included: *Triticum aestivum* ( $2n = 6x = 42$ ; AABBDD) cv. Chinese Spring *Tazip4-*  
104 *B2-ph1b* mutant line (Sears, 1977); *Triticum aestivum* cv. Chinese Spring-rye hybrids – crosses between the  
105 *Tazip4-B2-ph1b* mutant line hexaploid wheat and rye (*Secale cereal* cv. Petkus ( $2n = 2x = 14$ ; RR)); *Triticum*  
106 *aestivum* cv. Chinese Spring-*Aegilops variabilis* hybrids – crosses between *Tazip4-B2-ph1b* mutant and *Ae.*  
107 *variabilis* Eig. ( $2n = 4x = 28$ ; UUS<sup>v</sup>S<sup>v</sup>); *Triticum aestivum* cv. Cadenza-*Ae. variabilis* hybrids - crosses between  
108 Cad1691 and Cad0348, *Tazip4-B2* TILLING mutants and *Ae. variabilis* (Krasileva et al., 2016; Rey et al., 2017));  
109 and *Triticum aestivum* cv. Fielder-*Ae. variabilis* hybrids - crosses between *Tazip4-B2* CRISPR mutant and *Ae.*  
110 *variabilis* (see Production of *TaZIP4-B2* knock-out using RNA-guided Cas9, Materials and Methods).

## 111 Nutrient solution treatments

112 The total number of plants used in this work is described in Table S1. All seedlings were vernalised for 3 weeks  
113 at 7°C under a photoperiod of 16h light/8h dark, and then transferred to a controlled environmental room until  
114 meiosis (approximately 2 months later for all genotypes used in this study). The growth conditions were 16h/8h,  
115 light/dark photoperiod at 20°C day and 15°C night, with 70% humidity. At least two weeks before meiosis,  
116 irrigation of plants with a Hoagland solution (100 mL per plant) was commenced following the method previously  
117 described in Martín et al., (2017). Briefly, plants were irrigated once a week with a Hoagland solution (100mL)  
118 from the stem elongation stage of the vegetative stage (stage 7-8, Feeke's scale). The composition of the Hoagland  
119 solution was: (*macronutrients*) KNO<sub>3</sub> (12 mM), Ca (NO<sub>3</sub>)<sub>2</sub>·4H<sub>2</sub>O (4 mM), NH<sub>4</sub> H<sub>2</sub>PO<sub>4</sub> (2 mM), Mg SO<sub>4</sub>·7H<sub>2</sub>O  
120 (1 mM); and (*micronutrients*) NaFe-EDTA (60 mM), KCl (50 µM), H<sub>3</sub>BO<sub>3</sub> (25 µM), Mn SO<sub>4</sub>·H<sub>2</sub>O (2 µM), Zn  
121 SO<sub>4</sub> (4 µM), Cu SO<sub>4</sub>·5H<sub>2</sub>O (0.5 µM), H<sub>2</sub>MoO<sub>4</sub> (0.5 µM). Four treatments were carried out to analyse the effect of  
122 the absence of NH<sub>4</sub> H<sub>2</sub>PO<sub>4</sub>, KNO<sub>3</sub>, Ca (NO<sub>3</sub>)<sub>2</sub>·4H<sub>2</sub>O or Mg SO<sub>4</sub>·7H<sub>2</sub>O from the Hoagland solution on  
123 homoeologous CO frequency in *Tazip4-B2-ph1b* mutant-rye hybrids. For each treatment, a different Hoagland  
124 solution was prepared in the absence of each macronutrient (NH<sub>4</sub> H<sub>2</sub>PO<sub>4</sub>, KNO<sub>3</sub>, Ca (NO<sub>3</sub>)<sub>2</sub>·4H<sub>2</sub>O or Mg  
125 SO<sub>4</sub>·7H<sub>2</sub>O). Moreover, the effect of the presence of only Mg SO<sub>4</sub>·7H<sub>2</sub>O (Mg SO<sub>4</sub>·7H<sub>2</sub>O is designed as Mg<sup>2+</sup> in  
126 the manuscript) in only water rather than in Hoagland solution on CO frequency was also analysed in *Tazip4-B2-*  
127 *ph1b* mutant-rye hybrids in comparison to the effects of Hoagland solution. Also, two different concentrations of  
128 Mg<sup>2+</sup> (1mM and 2mM of Mg<sup>2+</sup> in water) were used to assess the homoeologous CO frequency in *Tazip4-B2-ph1b*  
129 mutant-rye hybrids. The treatment with either Mg<sup>2+</sup> in water alone or Hoagland solution in *Tazip4-B2 ph1b*  
130 mutant-*Ae. variabilis*, and *Tazip4-B2* TILLING and CRISPR mutant-*Ae. variabilis* hybrids was also assessed.  
131 Assessment of the addition of Mg<sup>2+</sup> in water alone on homoeologous CO frequency was also made on non-  
132 irrigated plants, by injecting into *Tazip4-B2 ph1b* mutant-rye hybrids tillers a solution containing 1mM Mg<sup>2+</sup> in  
133 water (0.5 mL per spike) just above every spike (three spikes with water alone and three spikes with Mg<sup>2+</sup> in  
134 water). All spikes were analysed 24-48h after the injection.

135

## 136 Feulgen-stained analysis

137 After either irrigating with Hoagland or Mg<sup>2+</sup> solution, or injecting the Mg<sup>2+</sup> solution, tillers were harvested when  
138 the flag leaf was completely emerged, and only anthers at meiotic metaphase I were collected and fixed in 100%

139 ethanol/acetic acid 3:1 (v/v). The anthers used in this study were taken from spikelets in the lower half of the  
140 spike. From each spikelet, the 2 largest florets (on opposing sides of the floret) were used. From each dissected  
141 floret, one of the three synchronised anthers was squashed in 45% acetic acid/distilled water (v/v) and the  
142 meiocytes assessed for being at meiotic metaphase I by observation under a phase contrast microscope (LEICA  
143 DM2000 microscope (LeicaMicrosystems, <http://www.leica-microsystems.com/>)). The two remaining anthers  
144 were left then fixed in 100% ethanol/acetic acid 3:1 (v/v) for cytological analysis of meiocytes. The anthers were  
145 incubated in ethanol/acetic acid at 4°C for at least 24h. Cytological analysis of meiocytes at metaphase I was  
146 performed using Feulgen reagent as previously described in Sharma and Sharma, (2014). Metaphase I meiocytes  
147 were observed under a phase contrast microscope equipped with a Leica DFC450 camera and controlled by LAS  
148 v4.4 system software (Leica Biosystems, Wetzlar, Germany). The digital images were used to determine the  
149 meiotic configurations of the meiocytes by counting the number of univalents, rod (1 chiasma) and ring (2  
150 chiasmata) bivalents and multivalents (trivalents (1-2 chiasmata), tetravalents (3 chiasmata) and pentavalents (4  
151 chiasmata)). Two different methods depending on the number of chiasma (single or double chiasmata) were used  
152 to calculate chiasma frequency per meiocyte (see Figure S1 for examples of the scored structures). Images were  
153 processed using Adobe Photoshop CS5 (Adobe Systems Incorporated, US) extended version 12.0 x 64.

154

## 155 **Production of *TaZIP4-B2* CRISPR mutants using RNA-guided Cas9**

156 Three single guide RNAs (sgRNA) were designed manually to specifically target *TaZIP4-B2*. These guides were  
157 in the limited regions where there was sufficient variation between *ZIP4* on 5BL and homoeologous group 3  
158 chromosomes (Figure 3). The specific guides were: Guide 4: 5'GATGAGCGACGCATCCTGCT3', Guide 11:  
159 5'GATGCGTCGCTCATCCTCCG3' and Guide 12: 5'GAAGAAGGATGCGGCCTTGA3' (Figure 3). Two  
160 constructs were assembled using standard Golden Gate assembly (Werner et al., 2012) with each construct  
161 containing the Hygromycin resistance gene under the control of a rice Actin1 promoter, Cas9 under the control of  
162 the rice ubiquitin promoter and two of the sgRNAs each under the control of a wheat U6 promoter (Figure 3).  
163 Construct 1 contained guides 4 and 12 and construct 2 contained guides 11 and 12. To produce each gRNA, a  
164 PCR reaction was performed using Phusion High-Fidelity Polymerase (Thermo Scientific M0530S) with a  
165 forward primer containing the gRNA sequence, and a standard reverse primer  
166 5'TGTGGTCTCAAGCGTAATGCCAACTTTGTAC3' using the plasmid pICSL70001::U6p::gRNA (Addgene  
167 plasmid 46966) as template. Each gRNA was cloned individually into the level 1 vectors pICH47751 (gRNA4 &

168 11) and pICH47761 (gRNA12). Level 1 construct pICH47802-RActpro::Hpt::NosT (selection maker),  
169 pICH47742-RUbipro::Cas9::NosT and the gRNAs were then assembled in the binary Level 2 vector pAGM8031  
170 (Addgene 48037) (Figure 3).

171 The two constructs were introduced to *T. aestivum* cv. Fielder by Agrobacterium-mediated inoculation of  
172 immature embryos. 450 immature embryos were inoculated with Agrobacterium strain AGL1 containing each  
173 construct. Briefly, after 3 days co-cultivation with Agrobacterium, immature embryos were selected on 15 mg/l  
174 hygromycin during callus induction for 2 weeks and 30 mg/l hygromycin for 3 weeks in the dark at 24°C on  
175 Murashige and Skoog medium (MS; Murashige and Skoog, 1962) 30 g/l Maltose, 1.0 g/l Casein hydrolysate, 350  
176 mg/l Myo-inositol, 690 mg/l Proline, 1.0 mg/l Thiamine HCl (Harwood et al., 2009) supplemented with 2 mg/l  
177 Picloram, 0.5 mg/l 2,4-Dichlorophenoxyacetic acid (2,4-D). Regeneration was under low light (140 µmol.m<sup>-2</sup>.s<sup>-1</sup>)  
178 1) conditions on MS medium with 0.5 mg/l Zeatin and 2.5 mg/l CuSO<sub>4</sub>·5H<sub>2</sub>O.

179 Primary transgenic plants (T<sub>0</sub>) were analysed by PCR across the region of interest. The sequences for the forward  
180 and reverse primers used for the screening in T<sub>0</sub> were 5'AGTGGTGAATCCATCCCTTG3' and  
181 5'CCTTCCTCTTCTTGCCTGG3', respectively (Rey et al., 2017), followed by direct sequencing. The PCR  
182 was performed using RedTaq ReadyMix PCR Reaction Mix (Sigma, St. Louis, MO, USA; R2523) according to  
183 the manufacturer's instructions. PCR conditions were: 3 min 95C, 35 cycles of 15s at 95C, 15s at 58C and 30s at  
184 72C. T<sub>0</sub> plants with edits in *TaZIP4-B2* were progressed to the T<sub>1</sub> generation and 24 T<sub>1</sub> seedlings from each  
185 original T<sub>0</sub> plant were analysed in the same way for the presence of edits.

186

## 187 **Statistical analyses**

188 Statistical analyses were performed using STATISTIX 10.0 software (Analytical Software, Tallahassee, FL,  
189 USA). Analysis of variance (ANOVA) in *Tazip4-B2 ph1b* mutant-rye hybrids, *Tazip4-B2* TILLING mutant-*Ae.*  
190 *variabilis* hybrids and *Tazip4-B2* CRISPR mutant-*Ae. variabilis* hybrids was based on a completely randomised  
191 design. Several transformations were carried out: tangent (ring bivalents), arcsine (trivalents) and logarithm  
192 (double CO) transformations in the analysis of the effect of absence of each macronutrients in homoeologous CO  
193 frequency in *Tazip4-B2 ph1b* mutant-rye hybrids; exponential (ring bivalents) transformation in *Tazip4-B2 ph1b*  
194 mutant-*Ae. variabilis* hybrids; exponential (rod bivalents, rings bivalents and trivalents) transformation in *Tazip4-*  
195 *B2* TILLING mutant (Cad1691)-*Ae. variabilis* hybrids; and square root (ring bivalents) and exponential

196 (trivalents) transformations in *Tazip4-B2* TILLING mutant (Cad0348)-*Ae. variabilis* hybrids. Means were  
197 separated using the Least Significant Difference (LSD) test with a probability level of 0.05. Both *Tazip4-B2*  
198 CRISPR mutant lines and *Tazip4-B2* CRISPR mutant-*Ae. variabilis* hybrids were analysed by the Kruskal–Wallis  
199 test (nonparametric one-way analysis of variance). Means were separated using the Dunn’s test with a probability  
200 level of 0.05.

201

## 202 **Results**

### 203 **Magnesium increases homoeologous COs in *Tazip4-B2 ph1b* mutant-rye hybrids**

204 The *Tazip4-B2 ph1b* mutant-rye hybrids were obtained by crosses between the hexaploid wheat cv. Chinese  
205 Spring *Tazip4-B2 ph1b* mutant and rye. These hybrids were used to analyse which macronutrient ( $\text{NH}_4 \text{H}_2\text{PO}_4$ ,  
206  $\text{KNO}_3$ ,  $\text{Ca} (\text{NO}_3)_2 \cdot 4\text{H}_2\text{O}$  or  $\text{Mg} \text{SO}_4 \cdot 7\text{H}_2\text{O}$ ) present within in the Hoagland solution detailed in Martín et al.,  
207 (2017) could be responsible for the increased CO number observed in the *Tazip4-B2 ph1b* mutant-rye hybrids. To  
208 assess the effect of the absence of each macronutrient in homoeologous CO frequency in meiotic metaphase I, we  
209 irrigated several *Tazip4-B2 ph1b* mutant-rye hybrids with: 1) Hoagland solution; 2) water alone; 3) Hoagland  
210 solution minus  $\text{KNO}_3$ ; 4) Hoagland solution minus  $\text{Ca} (\text{NO}_3)_2 \cdot 4\text{H}_2\text{O}$ ; 5) Hoagland solution minus  $\text{NH}_4 \text{H}_2\text{PO}_4$ ; 6)  
211 Hoagland solution minus  $\text{MgSO}_4 \cdot 7\text{H}_2\text{O}$  ( $\text{MgSO}_4 \cdot 7\text{H}_2\text{O}$  is designed as  $\text{Mg}^{2+}$  in the manuscript) (Table 1). The  
212 absence of each Hoagland solution macronutrient caused a slight increase in homoeologous CO frequency, except  
213 for the treatment lacking  $\text{Mg}^{2+}$ , where a significant decrease in homoeologous CO frequency per meiocyte was  
214 observed at meiotic metaphase I in these hybrids (Table 1). No significant differences in CO frequency at  
215 metaphase I were observed between hybrids treated with water alone and those treated with the Hoagland solution  
216 minus  $\text{Mg}^{2+}$  (a mean of 7.91 chiasmata for hybrids treated with water alone and 8.09 chiasmata for hybrids treated  
217 with Hoagland solution minus  $\text{Mg}^{2+}$  (Table 1)).

218 Additionally, we scored all meiocytes for the occurrence of double chiasmata in the metaphase I chromosomal  
219 configurations (examples highlighted by arrows in Figure S1). When double chiasmata were considered in the  
220 chiasma frequency, a mean of 8.15 chiasmata and 8.62 chiasmata was observed respectively in *Tazip4-B2 ph1b*  
221 mutant-rye hybrids treated with water alone, and those treated with the Hoagland solution minus  $\text{Mg}^{2+}$  (Table 1).  
222 As expected, no significant differences were observed between the two treatments when double chiasmata were  
223 considered in these *Tazip4-B2 ph1b* hybrids.



224 Once the absence of  $Mg^{2+}$  was demonstrated to decrease homoeologous CO frequency in *Tazip4-B2 ph1b* mutant-  
225 rye hybrids, the effect of irrigating with only  $Mg^{2+}$  present at a final concentration of 1mM in water rather than in  
226 the Hoagland solution, was also analysed on homoeologous COs in *Tazip4-B2 ph1b* mutant-rye hybrids (Figure  
227 1). Treatment with a solution containing only  $Mg^{2+}$  also increased homoeologous COs at metaphase I per meiocyte  
228 in these hybrids, showing no significant difference in comparison to the Hoagland solution treatment. A mean of  
229 11.09 chiasmata was observed after treatment with 1mM  $Mg^{2+}$  in water, and 10.74 chiasmata after treatment with  
230 the Hoagland solution (Figure 1), when a single chiasma was considered. A similar situation was seen when  
231 double chiasmata were considered: no significant differences were observed in homoeologous COs per meiocyte  
232 in *Tazip4-B2 ph1b* mutant-rye hybrids after treatment with either 1mM  $Mg^{2+}$  or Hoagland solutions (Figure 1).

233 The concentration of  $Mg^{2+}$  was subsequently increased to a final concentration of 2mM to assess whether the  
234 number of homoeologous COs could be increased further (Figure 1). Surprisingly, numbers of COs were reduced  
235 under these conditions (mean 11.09 for 1mM  $Mg^{2+}$  and 8.84 for 2mM  $Mg^{2+}$  treatments respectively, when single  
236 chiasma were considered, and 12.11 and 9.90, respectively, when double chiasmata were considered).

237 In addition to irrigating the plants with either Hoagland or  $Mg^{2+}$  solutions, we analysed the effect of treatment  
238 with 1mM  $Mg^{2+}$  in water following injection into the tillers of *Tazip4-B2 ph1b* mutant-rye hybrids. Injections  
239 were made just above each spike. Once again, homoeologous CO frequency was significantly increased in hybrids  
240 treated with 1mM  $Mg^{2+}$  when the solution was injected into the tiller (Table 2). A mean of 8.98 chiasmata in  
241 hybrids treated with water alone and 10.60 chiasmata in hybrids treated with 1mM  $Mg^{2+}$  was observed in the  
242 hybrids considering a single chiasma (Table 2) and a mean of 9.67 chiasmata and 11.30 chiasmata considering  
243 double chiasmata (Table 2).

244

## 245 **Magnesium increases homoeologous COs in *Tazip4-B2 ph1b* mutant-*Ae. variabilis* hybrids**

246 The addition of  $Mg^{2+}$  is thus identified as responsible for the increase in homoeologous CO at meiotic metaphase  
247 I in *Tazip4-B2 ph1b* mutant-rye hybrids. We then assessed the effect of 1mM  $Mg^{2+}$  on *T. aestivum* cv. Chinese  
248 spring *Tazip4-B2 ph1b* mutant-*Ae. variabilis* hybrids. Firstly, we scored the number of univalents, bivalents and  
249 multivalents, and total chiasma frequency in this hybrid, to compare the level of chiasma frequency to that  
250 previously reported by Kousaka and Endo, (2012) in *T. aestivum* cv. Chinese spring-*Ae. variabilis* hybrids in the  
251 absence of chromosome 5B. We observed a similar chiasma frequency in our hybrid (mean 14.15 chiasmata per

252 meiocyte), to that previously reported in *T. aestivum* cv. Chinese spring-*Ae. variabilis* hybrids in the absence of  
253 chromosome 5B (mean of 14.09 chiasmata per meiocyte), confirming a similar level of meiotic metaphase I  
254 configuration in these hybrids.

255 We then analysed the effect of treatment with water alone and with either 1mM Mg<sup>2+</sup> solution or complete  
256 Hoagland solution on the *Tazip4-B2 ph1b* mutant-*Ae. variabilis* hybrids. The total number of COs was  
257 significantly higher after treatment with 1mM Mg<sup>2+</sup> than after treatment with water alone (without Mg<sup>2+</sup> control),  
258 both in the case of single chiasma and double chiasmata, showing a mean of 15.31 and 14.15 chiasmata in the  
259 case of single chiasma, and a mean of 16.54 and 15.10 chiasmata in the case of double chiasmata, respectively  
260 (Figure 2). The number of univalents was significantly decreased and the number of trivalents was significantly  
261 increased when the plants were treated with 1mM Mg<sup>2+</sup> solution in comparison to when Mg<sup>2+</sup> was absent (a mean  
262 of 11.14 and 1.99, respectively, after treatment with 1mM Mg<sup>2+</sup> and a mean of 12.49 and 1.60, respectively, after  
263 treatment with water alone were observed in Figure 2). With regard to the Hoagland solution treatment, significant  
264 differences were observed between hybrids treated with water alone and hybrids treated with Hoagland solution  
265 (Figure 2). Hoagland solution treatment showed the highest chiasma frequency, followed by 1mM Mg<sup>2+</sup> and water  
266 alone (means of 16.53, 15.31 and 14.15 chiasmata were observed, respectively, when a single chiasma was  
267 considered, and means of 18.05, 16.54 and 15.10 chiasmata were observed, respectively, when double chiasmata  
268 were considered (Figure 2)).

269

## 270 **Magnesium increases homoeologous COs in wheat *Tazip4-B2* TILLING mutant-*Ae.*** 271 ***variabilis* mutant hybrids**

272 Recently we reported that *Tazip4-B2* TILLING mutants crossed with *Ae. variabilis* exhibited homoeologous COs  
273 at meiotic metaphase I. We therefore decided to analyse whether the level of homoeologous COs induced by  
274 *Tazip4-B2* TILLING mutants was also affected by treatment with 1mM Mg<sup>2+</sup> solution. To assess the effect of  
275 1mM Mg<sup>2+</sup> on homoeologous CO frequency at metaphase I, we added 100 mL per plant of a solution of either  
276 1mM Mg<sup>2+</sup> in water or Hoagland solution once a week to the soil in which these hybrids were growing. In this  
277 experiment, we analysed both *Tazip4-B2* TILLING mutant lines (Cad1691 and Cad0348) (Rey et al., 2017),  
278 crossed with *Ae. variabilis*. Both TILLING mutant hybrids showed a significant increase in chiasma frequency  
279 after treatment with 1mM Mg<sup>2+</sup>, compared to chiasma frequency obtained in both the hybrids treated with water  
280 alone. The *Tazip4-B2* TILLING mutant (Cad1691)-*Ae. variabilis* and the *Tazip4-B2* TILLING mutant (Cad0348)-

281 *Ae. variabilis* hybrids showed means of 13.41 and 13.66 single chiasma frequency, respectively, after treatment  
282 with 1mM Mg<sup>2+</sup> and means of 12.21 and 12.23 single chiasma frequency, respectively, in water alone (Table 3;  
283 Figure S2). Significant differences were also observed when double chiasmata were scored in both mutant lines  
284 (Table 3; Figure S2). Numbers of univalents and trivalents were also affected by treatment with 1mM Mg<sup>2+</sup> in  
285 both mutant lines as in the *Tazip4-B2 ph1b* mutant-*Ae. variabilis* hybrids described in the previous section.  
286 Numbers of univalents were significantly decreased both in *Tazip4-B2* TILLING mutant (Cad1691)-*Ae. variabilis*  
287 and *Tazip4-B2* TILLING mutant (Cad0348)-*Ae. variabilis* hybrids treated with 1mM Mg<sup>2+</sup> (means of 12.74 and  
288 12.11 univalents respectively with Mg<sup>2+</sup> and means of 14.74 and 14.63 univalents respectively with water alone  
289 (Table 3)). Numbers of trivalents were significantly increased both in wheat (Cad1691)-*Ae. variabilis* and wheat  
290 (Cad0348)-*Ae. variabilis* hybrids, after treatment with 1mM Mg<sup>2+</sup> (means of 1.63 and 1.93 trivalents respectively  
291 with Mg<sup>2+</sup>, and means of 1.05 and 1.27 trivalents respectively with water alone (Table 3)).

292 Finally, we assessed the effect of treating with Hoagland solution and with water alone, finding significant  
293 differences in homoeologous COs between the two treatments, both in *Tazip4-B2* TILLING mutant (Cad1691)-  
294 *Ae. variabilis* and *Tazip4-B2* TILLING mutant (Cad0348)-*Ae. variabilis* hybrids. Numbers of univalents and  
295 trivalents were also affected to the same extent (Table 3). In the *Tazip4-B2* TILLING mutant (Cad1691)-*Ae.*  
296 *variabilis* hybrid, means of 14.74 univalents and 1.05 trivalents were observed in hybrids treated with water alone,  
297 and means of 11.94 univalents and 1.50 trivalents observed in hybrids treated with Hoagland solution (Table 3).  
298 In the *Tazip4-B2* TILLING mutant (Cad0348)-*Ae. variabilis* hybrid, means of 14.63 univalents and 1.27 trivalents  
299 were observed in hybrids with water alone and means of 12.48 univalents and 1.76 trivalents in hybrids treated  
300 with Hoagland solution (Table 3).

301

## 302 **Phenotypic analysis of *Tazip4-B2* mutants generated by CRISPR/Cas9 system**

303 Firstly, eighty-one primary transgenic plants (T0) were analysed by PCR followed by direct sequencing. Four  
304 plants were identified with edits in the target region. One plant had a perfect 115bp deletion between guides G11  
305 and G12. Twenty-four T1 plants from this line were screened and 5 homozygous edited plants with the 115bp  
306 deletion were recovered. These plants were used to score the number of univalents, bivalents and multivalents,  
307 and total chiasma frequency in the *Tazip4-B2* mutant CRISPR lines (Figure 3). Wild-type Fielder lines were used  
308 as control plants (Figure 3). The *Tazip4-B2* CRISPR mutant lines exhibited a significant reduction in ring  
309 bivalents, from a mean of 18.33 to 14.84 in the wild-type Fielder and CRISPR mutant lines respectively (Figure

310 3). A significant increase in the number of univalents and rod bivalents was also observed, from means of 0.51  
311 univalents and 2.38 rod bivalents in the wild-type Fielder line, to means of 1.16 univalents and 4.93 rod bivalents  
312 in the CRISPR mutant lines (Figure 3). This indicates a significant reduction in homologous COs in these *Tazip4-*  
313 *B2* mutant lines (Figure 3). Chiasma frequency decreased from a mean of 39.07 single chiasma and 40.50 double  
314 chiasmata in the wild-type Fielder line, to a mean of 35.55 single chiasma and 37.11 double chiasmata in the  
315 *Tazip4-B2* CRISPR mutant (Figure 3).

316

### 317 **Magnesium also increases homoeologous COs in wheat *Tazip4-B2* CRISPR mutant-*Ae.*** 318 ***variabilis* mutant hybrids**

319 For this study, a wild-type Fielder and a *Tazip4-B2* CRISPR Fielder mutant line were crossed with *Ae. variabilis*  
320 to assess the level of homoeologous COs in the resulting hybrids (Table S2). Frequency of univalents, bivalents  
321 and multivalents, and total chiasma frequency were scored at meiotic metaphase I (Table S2). *Tazip4-B2* CRISPR  
322 mutant hybrids exhibited a significant increase in single chiasma frequency, from a mean of 3.15 in the wild-type  
323 Fielder-*Ae. variabilis* hybrid to 16.66 in the *Tazip4-B2* CRISPR-*Ae. variabilis* hybrid (Table S2). Double chiasma  
324 frequency was also increased in the *Tazip4-B2* CRISPR mutant hybrids (Table S2). There was also a similar  
325 increase in the chiasma frequency to that reported previously in *Tazip4-B2* TILLING-*Ae. variabilis* hybrids (Rey  
326 et al., (2017)).

327 Having observed the effect of treatment with Mg<sup>2+</sup> on homoeologous CO frequency in the *Tazip4-B2* TILLING  
328 mutant hybrids, we also analysed the effect of this ion on *Tazip4-B2* CRISPR mutants-*Ae. variabilis* hybrids. We  
329 added 100 mL of a solution of 1mM Mg<sup>2+</sup> in water or Hoagland solution once a week to the soil in which the  
330 hybrids were growing. As expected, the addition of nutrients to these mutant hybrids caused a significant increase  
331 in chiasma frequency (Table 4). *Tazip4-B2* CRISPR-*Ae. variabilis* hybrids treated with water alone exhibited  
332 means of 16.66 single chiasma frequency and 18.10 double chiasma frequency. Addition of 1mM Mg<sup>2+</sup> caused a  
333 significant increase in chiasma frequency of these mutant hybrids (means of 17.67 and 18.75 single and double  
334 chiasma frequency respectively) (Table 4). Also, the addition of Hoagland solution increased the homoeologous  
335 COs in these *Tazip4-B2* CRISPR hybrids. Means of 18.34 and 19.82 single and double chiasma frequency  
336 respectively, were observed in those plants treated with Hoagland solution (Table 4).

337

## 338 Discussion

339 Introgression of genetic material from relative species into bread wheat has been used in plant breeding for over  
340 50 years, although classical plant breeding methods to introgress wild relative segments into wheat are both  
341 inefficient and time consuming (Ko et al., 2002). Recent availability of SNP based arrays, combined with classical  
342 cytogenetic approaches, significantly enhanced our ability to exploit wild relatives (King et al., 2017a, 2017b),  
343 using lines carrying a deletion of either the whole of chromosome 5B, or a smaller 70Mb segment (*ph1b*) (Riley  
344 and Chapman, 1958; Sears and Okamoto, 1958; Sears, 1977), to increase the level of homoeologous crossovers  
345 between wild relatives and wheat chromosomes. Recombination between wild relative chromosomes and wheat  
346 chromosomes is, however, still limited. Thus, there is a need to find abiotic or biotic treatments such as  
347 temperature, nutritional availability, DNA-damaging agents, among others (Laming et al., 2017) to enhance  
348 recombination. Martín et al., (2017) recently reported an alternative tool to increase CO number in *Tazip4-B2*  
349 *ph1b* mutant-rye hybrids, using the addition of a Hoagland solution to the soil in which the plants are grown.  
350 Martín et al., (2017) also showed that the presence of the Hoagland solution did not affect the homoeologous CO  
351 number in wild-type wheat-rye hybrids.

352 Here, we report the successful identification of the particular Hoagland solution constituent responsible for the  
353 observed increase in homoeologous CO frequency. After analysing *Tazip4-B2 ph1b* mutant-rye hybrids in the  
354 absence of each separate Hoagland solution macronutrient, we observed a significant reduction in homoeologous  
355 CO frequency when the  $Mg^{2+}$  ion was absent. This suggests that the  $Mg^{2+}$  ion is mainly responsible for the effect  
356 of Hoagland solution on homoeologous COs described previously by Martín et al., (2017). These observations  
357 were obtained after cytogenetic analysis of meiotic configurations at meiotic metaphase I. The analysis involved  
358 scoring single and double chiasmata in the chromosomal structures (Figure S1). Single chiasma counting has  
359 commonly been used in many studies to measure chiasma frequency in wheat (Sears, 1977; Dhaliwal et al., 1977;  
360 Roberts et al., 1999). However, other studies have suggested that double chiasmata may occur in these  
361 chromosomal configurations (Gennaro et al., 2012; Dreissig et al., 2017). Double chiasmata were considered in  
362 the present study, as a high number of MLH1 sites were previously reported in *Tazip4-B2 ph1b* mutant-rye hybrids  
363 in Martín et al., (2014). In our studies, up to 19 chiasmata were scored in *Tazip4-B2 ph1b* mutant-rye hybrids,  
364 which is similar to the number of MLH1 sites observed previously (Martín et al., 2014).

365 The effect of treatment with a solution of 1mM  $Mg^{2+}$  in water, was analysed to confirm whether that the  $Mg^{2+}$  ion  
366 was responsible for the increase in homoeologous COs observed in these hybrids. The effect of treatment with

367 this solution was assessed either by irrigation of, or injection into *Tazip4-B2 ph1b* mutant-rye hybrids.  
368 Surprisingly, both methods of application increased homoeologous CO frequency in the *Tazip4-B2 ph1b* mutant-  
369 rye hybrids. Thus, the results from the injection method of application suggested that the 1mM Mg<sup>2+</sup> concentration  
370 was directly responsible for the increased homoeologous CO effect seen in the *Tazip4-B2 ph1b* mutant-rye  
371 hybrids, rather than through indirect effects on the plant growth or development. However, homoeologous CO  
372 frequency was decreased when the Mg<sup>2+</sup> concentration was increased further (Figure 1). This reduction in COs  
373 was associated with a significant increase in the number of univalents, and decrease in the number of ring bivalents  
374 and trivalents.

375 A recent study revealed that *TaZIP4-B2* within the 5B region defined by the 70Mb *ph1b* deletion, was responsible  
376 for the suppression of homoeologous COs in hybrids (Rey et al., 2017). *Tazip4-B2* TILLING mutants (one with  
377 a missense mutation and another with a nonsense mutation), when crossed with *Ae. variabilis*, exhibit similar  
378 levels of homoeologous CO that observed in *ph1b-Ae. variabilis* hybrids (Rey et al., 2017). It was therefore  
379 important to assess the effect of 1mM Mg<sup>2+</sup> solution on these *Tazip4-B2* TILLING mutant-*Ae. variabilis* hybrids  
380 to confirm that the effect was associated with *Tazip4-B2*, and that the Mg<sup>2+</sup> effect could also be observed in a  
381 different hybrid. Moreover, we also applied the CRISPR/Cas9 genome editing system in hexaploid wheat cv.  
382 Fielder to the mutant *TaZIP4-B2* to compare its mutant phenotype with those observed in TILLING mutant lines,  
383 and their *Ae. variabilis* hybrids. *Tazip4-B2* CRISPR mutants showed a significant decrease in homologous COs  
384 compared to control plants (*TaZIP4-B2* wild type wheat), similar to that already reported for *Tazip4-B2* TILLING  
385 mutants (Rey et al., 2017). Also, as expected, a significant increase was observed in *Tazip4-B2* CRISPR mutant-  
386 *Ae. variabilis* hybrids, similar to that observed in both *ph1b-Ae. variabilis* and *Tazip4-B2* TILLING mutant-*Ae.*  
387 *variabilis* hybrids. Furthermore, the addition of 1mM Mg<sup>2+</sup> to all these hybrids increased the frequency of  
388 homoeologous CO. This confirms that the Mg<sup>2+</sup> effect is associated with *Tazip4-B2*, and occurs in different  
389 hybrids. The only difference observed with the *Tazip4-B2* CRISPR and TILLING mutants was the occurrence of  
390 multivalents in the CRISPR mutants compared to the TILLING mutants (Figure 3 and Rey et al., 2017). This  
391 suggests that *TaZIP4-B2* not only promotes homologous COs and restricts homoeologous COs, but also  
392 contributes to the efficiency of homologous pairing. We hypothesize that the CRISPR deletion disrupts more of  
393 the *TaZIP4-B2* function than the TILLING mutants. Interestingly, in rice, *ZIP4* mutants have previously been  
394 reported to show a delay in completing homologous synapsis (Shen et al., 2012), however, in that diploid species,  
395 this does not lead to homoeologous COs because only homologues are present. However, in the *ph1b* mutant,  
396 delayed pairing of some homologues is observed until after the telomere bouquet, allowing some subsequent

397 homoeologous pairing to take place. This delayed pairing of homologues in the *ph1b* mutant is consistent with a  
398 *ZIP4* mutant phenotype.

399 Magnesium is one of the most important nutrients, mainly involved in the general promotion of plant growth and  
400 development. In terms of CO function, Mg<sup>2+</sup> may affect multiple proteins in the class I interference crossover  
401 pathway either in a positive or negative manner. For example, recent studies have suggested that Mg<sup>2+</sup> is required  
402 for the endonuclease activity of the MLH1-MLH3 heterodimer (Rogacheva et al., 2014). The MLH1-MLH3  
403 heterodimer shows a strong preference for HJs in the absence of Mg<sup>2+</sup> (Ranjha et al., 2014). Whatever the target,  
404 our present study reveals that homoeologous COs can be increased by the 1mM Mg<sup>2+</sup> treatment of *Tazip4-B2*  
405 (*ph1b*, TILLING or CRISPR derived) mutant-wild relative hybrids. Thus, this treatment can be used as a tool to  
406 enhance the introgression of wild relative traits into wheat.

407

#### 408 **Author Contributions:**

409 M-DR, AM, PS and GM conceived and designed the study. MS, SH and WH participated in the development of  
410 the *Tazip4-B2* mutant in bread wheat cv. Fielder by CRISPR/Cas9 system. M-DR analysed the research results  
411 and wrote the first draft. PS and GM modified the paper. All authors have read and approved the final version of  
412 the manuscript.

413

414 **Conflict of Interest Statement:** The authors declare that the research was conducted in the absence of any  
415 commercial or financial relationships that could be construed as a potential conflict of interest.

416

#### 417 **References**

- 418 Al-Kaff, N., Knight, E., Bertin, I., Foote, T., Hart, N., Griffiths, S., and Moore, G. (2008). Detailed dissection of  
419 the chromosomal region containing the *Ph1* locus in wheat *Triticum aestivum*: with deletion mutants and  
420 expression profiling. *Ann. Bot.* 101(6), 863-872.
- 421 Bennett, M.D., and Rees, H. (1970). Induced variation in chiasma frequency in rye in response to phosphate  
422 treatments. *Genet. Res.* 16(3), 325-331.



- 423 Dhaliwal, H.S., Gill, B.S., and Waines, J.G. (1977). Analysis of induced homoeologous pairing in a *ph* mutant  
424 wheat x rye hybrid. *J. Hered.* 68(4), 207-209.
- 425 Dreissig, S., Fuchs, J., Himmelbach, A., Mascher, M., and Houben, A. (2017). Sequencing of single pollen nuclei  
426 reveals meiotic recombination events at megabase resolution and circumvents segregation distortion caused  
427 by postmeiotic processes. *Front. Plant Sci.* 8, 1620.
- 428 Fedak, G. (1973). Increased chiasma frequency in desynaptic barley in response to phosphate treatments. *Can. J.*  
429 *Genet. Cytol.* 15(3), 647-649.
- 430 Gennaro, A., Forte, P., Panichi, D., Lafiandra, D., Pagnotta, M. A., D'Egidio, M. G., and Ceoloni, C. (2012).  
431 Stacking small segments of the 1D chromosome of bread wheat containing major gluten quality genes into  
432 durum wheat: transfer strategy and breeding prospects. *Mol. breed.* 30(1), 149-167.
- 433 Grant, V. (1952). Cytogenetics of the hybrid *Gilia millefoliata* x *achilleaefolia*. 1. Variations in meiosis and  
434 polyploidy rate as affected by nutritional and genetics conditions. *Chromosoma* 5(1), 372-390.
- 435 Griffiths, S., Sharp, R., Foote, T.N., Bertin, I., Wanous, M., Reader, S., Colas, I., and Moore, G. (2006). Molecular  
436 characterization of *Ph1* as a major chromosome pairing locus in polyploid wheat. *Nature* 439(7077), 749-752.
- 437 Harwood, W.A., Bartlett, J., Alves, S., Perry, M., Smedley, M., Leyland, N., and Snape, J.W. (2009) Barley  
438 transformation using Agrobacterium-mediated techniques. In: Jones HD, Shewry PR, eds. Methods in  
439 molecular biology, transgenic wheat, barley and oats, Vol. 478, 137–147.
- 440 Hoagland D.R., and Arnon, D.I. (1950). The water-culture method of growing plants without soil. Calif. Agr.  
441 Expt. Sta. Circ. 347. 2nd edit.
- 442 Huber, D.M. (1980). The role of mineral nutrition in defense. *Plant Disease* Vol. V. Chapter 21.
- 443 King, J., Grewal, S., Yang, C. Y., Hubbart, S., Scholefield, D., Ashling, S., Edwards, K.J, Allen, A.M., Burrridge,  
444 A., Bloor, C., Davassy, A., da Silva, G.J., Charlmers, K., and King, I.P. (2017a). A step change in the transfer  
445 of interspecific variation into wheat from *Amblyopyrum muticum*. *Plant Biotechnol. J.* 15, 217-226.
- 446 King, J., Grewal, S., Yang, C. Y., Hubbart Edwards, S., Scholefield, D., Ashling, S., Harper, J.A., Allen, A.M.,  
447 Edwards, K.J., Burrridge, A.J., and King, I. P. (2017b). Introgression of *Aegilops speltoides* segments in  
448 *Triticum aestivum* and the effect of the gametocidal genes. *Ann. Bot.*, 121, 229-240.



- 449 Ko, J. M., Seo, B. B., Suh, D. Y., Do, G. S., Park, D. S., and Kwack, Y. H. (2002). Production of a new wheat  
450 line possessing the 1BL.1RS wheat-rye translocation derived from Korean rye cultivar Paldanghomil. *Theor.*  
451 *Appl. Genet.* 104, 171–176.
- 452 Kousaka, R., and Endo, T. R. (2012). Effect of a rye B chromosome and its segments on homoeologous pairing  
453 in hybrids between common wheat and *Aegilops variabilis*. *Genes Genet. Syst.* 87(1), 1-7.
- 454 Krasileva, K.V., Vasquez-Gross, H.A., Howell, T., Bailey, P., Paraiso, F., Clissold, L., Simmonds, K., Ramirez-  
455 Gonzalez, R.H., Wang, X., Borril, P., Fosker, C., Ayling, S., Phillips, A.L., Uauy, C., and Dubcovsky, J.  
456 (2017). Uncovering hidden variation in polyploid wheat. *Proc. Natl. Acad. Sci. USA* 7;114(6), E913-E921.
- 457 Lambing, C., Franklin, F.C.H., and Wang, C.J.R. (2017) Understanding and manipulating meiotic recombination  
458 in plants. *Plant Physiol.* 173: 1530-1542.
- 459 Law, C.N. (1963). An effect of potassium on chiasma frequency and recombination. *Genetica* 33(1), 313-329.
- 460 Maathuis, F. J. (2009). Physiological functions of mineral macronutrients. *Curr. Opin. Plant Biol.* 12(3), 250-258.
- 461 Martín, A.C., Shaw, P., Phillips, D., Reader, S., and Moore, G. (2014). Licensing MLH1 sites for crossover during  
462 meiosis. *Nat. Commun.* 5, 1-5.
- 463 Martín, A.C., Rey, M.D., Shaw, P., and Moore, G. (2017). Dual effect of the wheat *Ph1* locus on chromosome  
464 synapsis and crossover. *Chromosoma* 1-12. doi:10.1007/s00412-017-0630-0
- 465 Murashige, T., and Skoog, F. (1962). A Revised Medium for Rapid Growth and Bio Assays with Tobacco Tissue  
466 Cultures. *Physiol. Plant.* 15, 473–497.
- 467 Ranjha, L., Anand, R., and Cejka, P. (2014). The *Saccharomyces cerevisiae* Mlh1-Mlh3 heterodimer is an  
468 endonuclease that preferentially binds to Holliday junctions. *J. Biol. Chem.* 289(9), 5674-5686.
- 469 Rey, M.D., Martín, A.C., Higgins, J., Swarbreck, D., Uauy, C., Shaw, P., and Moore, G. (2017). Exploiting the  
470 *ZIP4* homologue within the wheat *Ph1* locus has identified two lines exhibiting homoeologous crossover in  
471 wheat-wild relative hybrids. *Mol. Breed.* 37(8), 95. doi:10.1007/s11032-017-0700-2
- 472 Riley, R., and Chapman, V. (1958). Genetic control of the cytological diploid behaviour of hexaploid wheat.  
473 *Nature* 182(4637), 713–715.

- 474 Roberts, M.A., Reader, S.M., Dalgliesh, C., Miller, T.E., Foote, T.N., Fish, L.J., Snape, J.W., and Moore, G.  
475 (1999). Induction and characterisation of the *Ph1* wheat mutants. *Genetics* 153(4), 1909-1918
- 476 Rogacheva, M. V., Manhart, C. M., Chen, C., Guarne, A., Surtees, J., and Alani, E. (2014). Mlh1-Mlh3, a meiotic  
477 crossover and DNA mismatch repair factor, is a Msh2-Msh3-stimulated endonuclease. *J. Biol. Chem.* 289(9),  
478 5664-5673.
- 479 Sears, E.R., and Okamoto, M. (1958). Intergenomic chromosome relationships in hexaploid wheat. Proc Xth  
480 Internat Congr Genet, Montreal, 2, 258-259.
- 481 Sears, E.R. (1977). Induced mutant with homoeologous pairing in common wheat. *Can. J. Genet. Cytol.* 19, 585-  
482 593.
- 483 Sharma, A.K., and Sharma, A. (2014). Chromosome techniques: theory and practice. Butterworth-Heinemann.
- 484 Shen, Y., Tang, D., Wang, K., Wang, M., Huang, J., Luo, W., Luo, Q., Hong, L., Li, M., and Cheng, Z. (2012)  
485 *ZIP4* in homologous chromosome synapsis and crossover formation in rice meiosis. *J. Cell Biol.* 125, 2581-  
486 2591.
- 487 Werner, S., Engler, C., Weber, E., Gruetzner, R., and Marillonnet, S. (2012). Fast track assembly of multigene  
488 constructs using Golden Gate cloning and the MoClo system. *Bioeng. Bugs* 3, 38-43.
- 489 Wilson, J.Y. (1959). Chiasma frequency in relation to temperature. *Genetica* 29(1), 290-303.

490

## 491 **Tables**

492 **TABLE 1 | Effect of the absence of each macronutrient in the Hoagland solution on the homoeologous CO**  
493 **frequency of *T. aestivum* cv. Chinese Spring *Tazip4-B2 ph1b* mutant-rye hybrids.** Frequencies of univalents,  
494 bivalents, trivalents and chiasma frequency (single and double chiasmata) were scored at meiotic metaphase I in  
495 *Tazip4-B2 ph1b* mutant-rye hybrids. Values in parenthesis indicate range of variation between cells. P < 0.05  
496 indicates significant differences according to LSD test.

497 **TABLE 2 | Effect of injecting 1mM Mg<sup>2+</sup> solution into the tillers of *Tazip4-B2 ph1b* mutant-rye hybrids.**  
498 Frequencies of univalents, bivalents, trivalents and chiasma frequency (single and double chiasmata) were scored  
499 at meiotic metaphase I in *Tazip4-B2 ph1b* mutant-rye hybrids treated with 1mM Mg<sup>2+</sup> solution and with water

500 alone. Values in parenthesis indicate range of variation between cells.  $P < 0.05$  indicates significant differences  
501 according to LSD test.

502 **TABLE 3 | Effect of either 1mM Mg<sup>2+</sup> or Hoagland solution on the homoeologous CO frequency of *T.***  
503 ***aestivum* cv. Cadenza (Cad1691-*Tazip4-B2*)-*Ae. variabilis* and *T. aestivum* cv. Cadenza (Cad0348-*Tazip4-***  
504 ***B2*)-*Ae. variabilis* hybrids.** Frequencies of univalents, bivalents, trivalents, tetravalents, pentavalents and chiasma  
505 frequency (single and double chiasmata) were scored at meiotic metaphase I in *Tazip4-B2* TILLING mutant-*Ae.*  
506 *variabilis* hybrids treated with either 1mM Mg<sup>2+</sup> or Hoagland solution. Values in parenthesis indicate range of  
507 variation between cells.  $P < 0.05$  indicates significant differences according to LSD test. \*This data published in  
508 Rey et al., (2017).

509 **TABLE 4 | Effect of either 1mM Mg<sup>2+</sup> or Hoagland solution on the homoeologous CO frequency of wheat**  
510 ***Tazip4-B2* CRISPR-*Ae. variabilis* mutant hybrids.** Frequencies of univalents, bivalents, trivalents, tetravalents,  
511 pentavalents and chiasma frequency (single and double chiasmata) were scored at meiotic metaphase I in *Tazip4-*  
512 *B2* CRISPR mutant-*Ae. variabilis* hybrids treated with either 1mM Mg<sup>2+</sup> or Hoagland solution. Values in  
513 parenthesis indicate range of variation between cells.  $P < 0.05$  indicates significant differences according to LSD  
514 test.

515

## 516 **Figure legends**

517 **FIGURE 1 |Effect of either 1mM or 2mM Mg<sup>2+</sup> on homoeologous CO frequency of *T. aestivum* cv. Chinese**  
518 **Spring *Tazip4-B2 ph1b* mutant-rye hybrids.** (A) Frequencies of univalents, bivalents, trivalents and chiasma  
519 frequency (single and double chiasmata) were scored at meiotic metaphase I in *Tazip4-B2 ph1b* mutant-rye  
520 hybrids treated with either Hoagland solution, 1mM Mg<sup>2+</sup> or 2mM Mg<sup>2+</sup> solution. Values in parenthesis indicate  
521 range of variation between cells.  $P < 0.05$  indicates significant differences according to LSD test. (B)  
522 Representative meiotic configurations of *Tazip4-B2 ph1b* mutant-rye hybrids. From left to right: treatment with  
523 Hoagland solution, 1mM Mg<sup>2+</sup> or 2mM Mg<sup>2+</sup> solution. Bar: 20  $\mu$ m.

524 **FIGURE 2 | Effect of either 1mM Mg<sup>2+</sup> or Hoagland solution on homoeologous CO frequency of *T. aestivum***  
525 **cv. Chinese Spring *Tazip4-B2 ph1b* mutant-*Ae. variabilis* hybrids.** (A) Frequencies of univalents, bivalents,  
526 trivalents, tetravalents, pentavalents and chiasma frequency (single and double chiasmata) were scored at meiotic  
527 metaphase I in *Tazip4-B2 ph1b* mutant-*Ae. variabilis* hybrids treated with either 1mM Mg<sup>2+</sup> or Hoagland solution.

528 Values in parenthesis indicate range of variation between cells.  $P < 0.05$  indicates significant differences according  
529 to LSD test. **(B)** Representative meiotic configurations of *Tazip4-B2 ph1b* mutant-*Ae. variabilis* hybrids. From  
530 left to right: water alone, 1mM  $Mg^{2+}$  treatment and Hoagland solution treatment. Bar: 20  $\mu$ m.

531 **FIGURE 3 | Development and phenotypic analysis of *Tazip4-B2* CRISPR mutants generated using RNA-**  
532 **guided Cas9.** **(A)** Schematic of the structure of the pGGG CRISPR *TaZip4-B2* vector used in this study. **(B)**  
533 Alignment of all copies of the *ZIP4* gene in wheat showing sequences and positions of the three sgRNAs designed  
534 to specifically target *TaZIP4-B2* with their corresponding protospacer-adjacent motif (PAM). **(C)** Alignment of  
535 *TaZIP4-B2* wild type and *Tazip4-B2 CRISPR* mutant sequences showing the localization of the large deletion (115  
536 bp) in *TaZIP4-B2*. **(D)** Genotypic assays for the identification of homozygous edited lines (lines: #2, #3, #4, #5  
537 and #6) and heterozygous lines (lines: #1 and #7). Wild-type Fielder (WT) was used as a control line. **(E)**  
538 Frequencies of univalents, bivalents and multivalents, and total chiasma frequency (single and double chiasmata)  
539 were scored at meiotic metaphase I in wild-type Fielder and *Tazip4-B2* CRISPR mutant. Values in parenthesis  
540 indicate range of variation between cells.  $P < 0.05$  indicates significant differences according to Dunn's test. **(F)**  
541 Representative meiotic metaphase I configurations of wild-type Fielder and *Tazip4-B2* CRISPR Fielder mutants.  
542 Left: wheat cv. Fielder and right: *Tazip4-B2* CRISPR mutant. Bar: 20  $\mu$ m.

543

544

545

546 **TABLE 1 | Effect of the absence of each macronutrient in the Hoagland solution on the homoeologous CO frequency of *T. aestivum* cv. Chinese Spring *Tazip4-B2***  
547 ***ph1b* mutant-rye hybrids.** Frequencies of univalents, bivalents, trivalents and chiasma frequency (single and double chiasmata) were scored at meiotic metaphase I in *Tazip4-*  
548 *B2 ph1b* mutant-rye hybrids. Values in parenthesis indicate range of variation between cells. P < 0.05 indicates significant differences according to LSD test.

|                                                                            | No. of cell examined | Univalents                           | Rod bivalents                      | Ring bivalents                      | Trivalents                         | Chiasma frequency                   | Chiasma frequency                   |
|----------------------------------------------------------------------------|----------------------|--------------------------------------|------------------------------------|-------------------------------------|------------------------------------|-------------------------------------|-------------------------------------|
|                                                                            |                      | Mean ± SE<br>(Range)                 | Mean ± SE<br>(Range)               | Mean ± SE<br>(Range)                | Mean ± SE<br>(Range)               | Mean ± SE<br>(Range)                | Mean ± SE<br>(Range)                |
|                                                                            |                      |                                      |                                    |                                     |                                    | Single Chiasma                      | Double Chiasmata                    |
| <b>Hoagland solution</b>                                                   | 109                  | 12.36 ± 0.21 <sup>c</sup><br>(7-18)  | 4.39 ± 0.14 <sup>a</sup><br>(2-8)  | 2.57 ± 0.10 <sup>abc</sup><br>(0-5) | 0.58 ± 0.07 <sup>a</sup><br>(0-3)  | 10.74 ± 0.16 <sup>a</sup><br>(7-14) | 12.03 ± 0.22 <sup>a</sup><br>(7-18) |
| <b>Water alone</b>                                                         | 108                  | 15.93 ± 0.16 <sup>a</sup><br>(12-20) | 4.03 ± 0.13 <sup>ab</sup><br>(1-7) | 1.68 ± 0.09 <sup>bc</sup><br>(0-4)  | 0.22 ± 0.04 <sup>bc</sup><br>(0-1) | 7.91 ± 0.13 <sup>d</sup><br>(5-10)  | 8.15 ± 0.15 <sup>d</sup><br>(5-12)  |
| <b>Hoagland solution - NH<sub>4</sub> H<sub>2</sub>PO<sub>4</sub></b>      | 92                   | 13.61 ± 0.22 <sup>b</sup><br>(8-17)  | 3.83 ± 0.14 <sup>b</sup><br>(2-8)  | 2.78 ± 0.13 <sup>a</sup><br>(0-6)   | 0.39 ± 0.06 <sup>ab</sup><br>(0-2) | 10.25 ± 0.18 <sup>b</sup><br>(7-14) | 11.03 ± 0.23 <sup>b</sup><br>(7-17) |
| <b>Hoagland solution - KNO<sub>3</sub></b>                                 | 93                   | 13.86 ± 0.22 <sup>b</sup><br>(6-18)  | 4.34 ± 0.16 <sup>a</sup><br>(2-8)  | 2.35 ± 0.12 <sup>abc</sup><br>(0-5) | 0.25 ± 0.05 <sup>c</sup><br>(0-2)  | 9.57 ± 0.18 <sup>c</sup><br>(7-16)  | 9.96 ± 0.19 <sup>c</sup><br>(7-16)  |
| <b>Hoagland solution - Ca (NO<sub>3</sub>)<sub>2</sub>·4H<sub>2</sub>O</b> | 102                  | 13.84 ± 0.20 <sup>b</sup><br>(9-18)  | 4.14 ± 0.13 <sup>ab</sup><br>(1-7) | 2.50 ± 0.09 <sup>c</sup><br>(0-4)   | 0.29 ± 0.05 <sup>bc</sup><br>(0-2) | 9.79 ± 0.15 <sup>c</sup><br>(7-14)  | 10.12 ± 0.17 <sup>c</sup><br>(7-15) |
| <b>Hoagland solution - Mg SO<sub>4</sub>·7H<sub>2</sub>O</b>               | 90                   | 15.63 ± 0.24 <sup>a</sup><br>(10-20) | 4.12 ± 0.16 <sup>ab</sup><br>(1-8) | 1.68 ± 0.13 <sup>ab</sup><br>(0-4)  | 0.26 ± 0.06 <sup>bc</sup><br>(0-2) | 8.09 ± 0.20 <sup>d</sup><br>(5-12)  | 8.62 ± 0.22 <sup>d</sup><br>(5-13)  |
| <b><i>P</i>-value</b>                                                      |                      | 0.0000                               | 0.0538                             | 0.0592                              | 0.0516                             | 0.0000                              | 0.0000                              |

549

550 **TABLE 2 | Effect of injecting 1mM Mg<sup>2+</sup> solution into the tillers of *Tazip4-B2 ph1b* mutant-rye hybrids.** Frequencies of univalents, bivalents, trivalents and chiasma  
551 frequency (single and double chiasmata) were scored at meiotic metaphase I in *Tazip4-B2 ph1b* mutant-rye hybrids treated with water alone and with 1mM Mg<sup>2+</sup> solution.  
552 Values in parenthesis indicate range of variation between cells. P < 0.05 indicates significant differences according to LSD test.

|                                 | No. of cell examined | Univalents                          | Rod bivalents                     | Ring bivalents       | Trivalents           | Chiasma frequency                   | Chiasma frequency                   |
|---------------------------------|----------------------|-------------------------------------|-----------------------------------|----------------------|----------------------|-------------------------------------|-------------------------------------|
|                                 |                      | Mean ± SE<br>(Range)                | Mean ± SE<br>(Range)              | Mean ± SE<br>(Range) | Mean ± SE<br>(Range) | Mean ± SE<br>(Range)                | Mean ± SE<br>(Range)                |
|                                 |                      |                                     |                                   |                      |                      | Single Chiasma                      | Double Chiasmata                    |
| <b>Water alone</b>              | 87                   | 15.02 ± 0.26 <sup>a</sup><br>(3-20) | 3.43 ± 0.16 <sup>b</sup><br>(0-7) | 2.12 ± 0.10<br>(0-4) | 0.63 ± 0.08<br>(0-3) | 8.98 ± 0.18 <sup>b</sup><br>(6-16)  | 9.67 ± 0.21 <sup>b</sup><br>(6-17)  |
| <b>With 1mM Mg<sup>2+</sup></b> | 79                   | 12.32 ± 0.26 <sup>b</sup><br>(5-18) | 4.32 ± 0.17 <sup>a</sup><br>(1-8) | 2.37 ± 0.12<br>(0-5) | 0.77 ± 0.08<br>(0-3) | 10.60 ± 0.19 <sup>a</sup><br>(7-16) | 11.30 ± 0.22 <sup>a</sup><br>(8-18) |
| <b><i>P-value</i></b>           |                      | 0.0000                              | 0.0001                            | 0.1079               | 0.2312               | 0.0000                              | 0.0000                              |

553

554

555

556

557

558 **TABLE 3 | Effect of either 1mM Mg<sup>2+</sup> or Hoagland solution on the homoeologous CO frequency of *T. aestivum* cv. Cadenza (Cad1691-Tazip4-B2)-*Ae. variabilis* and**  
559 ***T. aestivum* cv. Cadenza (Cad0348-Tazip4-B2)-*Ae. variabilis* hybrids.** Frequencies of univalents, bivalents, trivalents, tetravalents, pentavalents and chiasma frequency  
560 (single and double chiasmata) were scored at meiotic metaphase I in *Tazip4-B2* TILLING mutant-*Ae. variabilis* hybrids treated with either 1mM Mg<sup>2+</sup> or Hoagland solution.  
561 Values in parenthesis indicate range of variation between cells. P < 0.05 indicates significant differences according to LSD test. \*This data published in Rey et al., (2017).

|                                 |                                                | No. of cell examined | Univalents                          | Rod bivalents         | Ring bivalents       | Trivalents                        | Tetravalents         | Pentavalents         | Chiasma frequency                   |                                      |
|---------------------------------|------------------------------------------------|----------------------|-------------------------------------|-----------------------|----------------------|-----------------------------------|----------------------|----------------------|-------------------------------------|--------------------------------------|
|                                 |                                                |                      | Mean ± SE (Range)                   | Mean ± SE (Range)     | Mean ± SE (Range)    | Mean ± SE (Range)                 | Mean ± SE (Range)    | Mean ± SE (Range)    | Mean ± SE (Range)                   | Mean ± SE (Range)                    |
|                                 |                                                |                      |                                     |                       |                      |                                   |                      |                      | Single Chiasma                      | Double Chiasmata                     |
| <b>Water alone*</b>             | <b>Cad1691 x <i>Ae. variabilis</i> hybrids</b> | 106                  | 14.74 ± 0.29 <sup>a</sup><br>(7-26) | 6.75 ± 0.17<br>(3-11) | 1.26 ± 0.08<br>(0-4) | 1.05 ± 0.08 <sup>b</sup><br>(0-4) | 0.22 ± 0.04<br>(0-2) | 0.03 ± 0.02<br>(0-1) | 12.21 ± 0.19 <sup>b</sup><br>(8-18) | 12.74 ± 0.21 <sup>b</sup><br>(8-20)  |
|                                 | <b>Cad0348 x <i>Ae. variabilis</i> hybrids</b> | 102                  | 14.63 ± 0.28 <sup>a</sup><br>(6-21) | 6.64 ± 0.18<br>(3-10) | 1.12 ± 0.10<br>(0-4) | 1.27 ± 0.11 <sup>b</sup><br>(0-4) | 0.21 ± 0.04<br>(0-1) | 0.05 ± 0.02<br>(0-1) | 12.23 ± 0.20 <sup>b</sup><br>(7-19) | 12.68 ± 0.23 <sup>b</sup><br>(7-21)  |
| <b>With 1mM Mg<sup>2+</sup></b> | <b>Cad1691 x <i>Ae. variabilis</i> hybrids</b> | 95                   | 12.74 ± 0.33 <sup>b</sup><br>(5-19) | 7.06 ± 0.20<br>(2-11) | 1.18 ± 0.11<br>(0-3) | 1.63 ± 0.13 <sup>a</sup><br>(0-5) | 0.17 ± 0.30<br>(0-1) | 0.04 ± 0.02<br>(0-1) | 13.41 ± 0.22 <sup>a</sup><br>(8-18) | 13.75 ± 0.23 <sup>a</sup><br>(8-19)  |
|                                 | <b>Cad0348 x <i>Ae. variabilis</i> hybrids</b> | 110                  | 12.11 ± 0.32 <sup>b</sup><br>(3-20) | 6.93 ± 0.18<br>(1-12) | 1.51 ± 0.11<br>(0-4) | 1.93 ± 0.11 <sup>a</sup><br>(0-5) | 0.24 ± 0.04<br>(0-2) | 0.07 ± 0.02<br>(0-1) | 14.21 ± 0.23 <sup>a</sup><br>(9-21) | 14.90 ± 0.25 <sup>a</sup><br>(10-22) |
| <b>With Hoagland solution</b>   | <b>Cad1691 x <i>Ae. variabilis</i> hybrids</b> | 118                  | 11.94 ± 0.33 <sup>b</sup><br>(2-20) | 6.76 ± 0.23<br>(0-12) | 1.17 ± 0.10<br>(0-4) | 1.50 ± 0.11 <sup>a</sup><br>(0-5) | 0.26 ± 0.05<br>(0-2) | 0.04 ± 0.02<br>(0-1) | 13.66 ± 0.21 <sup>a</sup><br>(9-20) | 14.14 ± 0.22 <sup>a</sup><br>(9-21)  |
|                                 | <b>Cad0348 x <i>Ae. variabilis</i> hybrids</b> | 142                  | 12.48 ± 0.25 <sup>b</sup><br>(2-20) | 6.70 ± 0.17<br>(1-12) | 1.37 ± 0.09<br>(0-4) | 1.76 ± 0.10 <sup>a</sup><br>(0-5) | 0.23 ± 0.04<br>(0-2) | 0.04 ± 0.02<br>(0-1) | 13.84 ± 0.19 <sup>a</sup><br>(9-21) | 14.30 ± 0.21 <sup>a</sup><br>(9-22)  |
| <b>P-value</b>                  | <b>Cad1691 x <i>Ae. variabilis</i> hybrids</b> |                      | 0.0000                              | 0.1930                | 0.6630               | 0.0026                            | 0.3278               | 0.9376               | 0.0000                              | 0.0000                               |
|                                 | <b>Cad0348 x <i>Ae. variabilis</i> hybrids</b> |                      | 0.0000                              | 0.3220                | 0.5967               | 0.0003                            | 0.9720               | 0.3650               | 0.0000                              | 0.0000                               |

562

563 **TABLE 4 | Effect of either 1mM Mg<sup>2+</sup> or Hoagland solution on the homoeologous CO frequency of wheat *Tazip4-B2* CRISPR-*Ae. variabilis* mutant hybrids.** Frequencies  
564 of univalents, bivalents, trivalents, tetravalents, pentavalents and chiasma frequency (single and double chiasmata) were scored at meiotic metaphase I in *Tazip4-B2* CRISPR  
565 mutant-*Ae. variabilis* hybrids treated with either 1mM Mg<sup>2+</sup> or Hoagland solution. Values in parenthesis indicate range of variation between cells. P < 0.05 indicates significant  
566 differences according to LSD test.

|                                 | No. of cell examined | Univalents                         | Rod bivalents                      | Ring bivalents                    | Trivalents           | Tetravalents         | Pentavalents                      | Hexavalents          | Chiasma frequency                    |                                      |
|---------------------------------|----------------------|------------------------------------|------------------------------------|-----------------------------------|----------------------|----------------------|-----------------------------------|----------------------|--------------------------------------|--------------------------------------|
|                                 |                      | Mean ± SE (Range)                  | Mean ± SE (Range)                  | Mean ± SE (Range)                 | Mean ± SE (Range)    | Mean ± SE (Range)    | Mean ± SE (Range)                 | Mean ± SE (Range)    | Mean ± SE (Range)                    | Mean ± SE (Range)                    |
|                                 |                      |                                    |                                    |                                   |                      |                      |                                   |                      | Single Chiasma                       | Double Chiasmata                     |
| <b>Water alone</b>              | 124                  | 9.64 ± 0.27 <sup>a</sup><br>(3-17) | 5.64 ± 0.17 <sup>b</sup><br>(2-10) | 1.94 ± 0.11 <sup>b</sup><br>(0-6) | 2.37 ± 0.11<br>(0-6) | 0.52 ± 0.06<br>(0-3) | 0.20 ± 0.04 <sup>a</sup><br>(0-2) | 0.00 ± 0.00<br>(0-0) | 16.66 ± 0.21 <sup>c</sup><br>(11-22) | 18.10 ± 0.23 <sup>c</sup><br>(12-24) |
| <b>With 1mM Mg<sup>2+</sup></b> | 135                  | 7.92 ± 0.25 <sup>b</sup><br>(0-14) | 6.19 ± 0.15 <sup>a</sup><br>(3-11) | 2.02 ± 0.09 <sup>b</sup><br>(0-6) | 2.68 ± 0.09<br>(0-3) | 0.50 ± 0.06<br>(0-2) | 0.10 ± 0.01 <sup>b</sup><br>(0-1) | 0.01 ± 0.01<br>(0-1) | 17.67 ± 0.17 <sup>b</sup><br>(14-23) | 18.75 ± 0.20 <sup>b</sup><br>(14-24) |
| <b>With Hoagland solution</b>   | 125                  | 7.90 ± 0.28 <sup>b</sup><br>(0-15) | 5.56 ± 0.17 <sup>b</sup><br>(1-11) | 2.82 ± 0.11 <sup>a</sup><br>(0-6) | 2.53 ± 0.11<br>(0-5) | 0.59 ± 0.07<br>(0-3) | 0.08 ± 0.03 <sup>b</sup><br>(0-2) | 0.00 ± 0.00<br>(0-0) | 18.34 ± 0.21 <sup>a</sup><br>(14-24) | 19.82 ± 0.23 <sup>a</sup><br>(15-25) |
| <b>P-value</b>                  |                      | 0.0000                             | 0.0121                             | 0.0000                            | 0.1021               | 0.5929               | 0.0259                            | 0.1575               | 0.0000                               | 0.0000                               |

567



| A                         | No. of cell examined | Univalents                              | Rod bivalents                          | Ring bivalents                        | Trivalents                            | Chiasma frequency                       |                                         |
|---------------------------|----------------------|-----------------------------------------|----------------------------------------|---------------------------------------|---------------------------------------|-----------------------------------------|-----------------------------------------|
|                           |                      | Mean $\pm$ SE<br>(Range)                | Mean $\pm$ SE<br>(Range)               | Mean $\pm$ SE<br>(Range)              | Mean $\pm$ SE<br>(Range)              | Mean $\pm$ SE<br>(Range)                | Mean $\pm$ SE<br>(Range)                |
|                           |                      |                                         |                                        |                                       |                                       | Single Chiasma                          | Double Chiasmata                        |
| With Hoagland solution    | 109                  | 12.36 $\pm$ 0.21 <sup>b</sup><br>(7-18) | 4.39 $\pm$ 0.14 <sup>a</sup><br>(2-8)  | 2.57 $\pm$ 0.10 <sup>a</sup><br>(0-5) | 0.58 $\pm$ 0.07 <sup>b</sup><br>(0-3) | 10.74 $\pm$ 0.16 <sup>a</sup><br>(7-14) | 12.03 $\pm$ 0.22 <sup>a</sup><br>(7-18) |
| With 1mM Mg <sup>2+</sup> | 117                  | 12.26 $\pm$ 0.25 <sup>b</sup><br>(4-17) | 3.88 $\pm$ 0.13 <sup>b</sup><br>(1-7)  | 2.81 $\pm$ 0.10 <sup>a</sup><br>(0-5) | 0.79 $\pm$ 0.07 <sup>a</sup><br>(0-3) | 11.09 $\pm$ 0.19 <sup>a</sup><br>(7-18) | 12.11 $\pm$ 0.23 <sup>a</sup><br>(7-19) |
| With 2mM Mg <sup>2+</sup> | 107                  | 14.62 $\pm$ 0.24 <sup>a</sup><br>(7-20) | 4.09 $\pm$ 0.14 <sup>ab</sup><br>(1-7) | 1.89 $\pm$ 0.12 <sup>b</sup><br>(0-5) | 0.46 $\pm$ 0.06 <sup>b</sup><br>(0-2) | 8.84 $\pm$ 0.18 <sup>b</sup><br>(6-14)  | 9.90 $\pm$ 0.21 <sup>b</sup><br>(6-15)  |
| <i>P</i> -value           |                      | 0.0000                                  | 0.0316                                 | 0.0000                                | 0.0022                                | 0.0000                                  | 0.0000                                  |

B

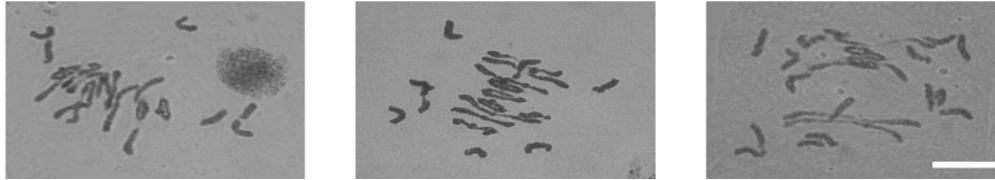

568

569 **FIGURE 1 |Effect of either 1mM or 2mM Mg<sup>2+</sup> on homoeologous CO frequency of *T. aestivum* cv. Chinese**

570 **Spring *Tazip4-B2 ph1b* mutant-rye hybrids. (A) Frequencies of univalents, bivalents, trivalents and chiasma**

571 **frequency (single and double chiasmata) were scored at meiotic metaphase I in *Tazip4-B2 ph1b* mutant-rye**

572 **hybrids treated with either Hoagland solution, 1mM Mg<sup>2+</sup> or 2mM Mg<sup>2+</sup> solution. Values in parenthesis indicate**

573 **range of variation between cells. P < 0.05 indicates significant differences according to LSD test. (B)**

574 **Representative meiotic configurations of *Tazip4-B2 ph1b* mutant-rye hybrids. From left to right: treatment with**

575 **Hoagland solution, 1mM Mg<sup>2+</sup> or 2mM Mg<sup>2+</sup> solution. Bar: 20  $\mu$ m.**

576

577

578

579

580

581

582

583

584

585

| A                            | No. of cell examined | Univalents                              | Rod bivalents                          | Ring bivalents                        | Trivalents                            | Tetralents               | Pentavalents             | Chiasma frequency                        |                                          |
|------------------------------|----------------------|-----------------------------------------|----------------------------------------|---------------------------------------|---------------------------------------|--------------------------|--------------------------|------------------------------------------|------------------------------------------|
|                              |                      | Mean $\pm$ SE<br>(Range)                | Mean $\pm$ SE<br>(Range)               | Mean $\pm$ SE<br>(Range)              | Mean $\pm$ SE<br>(Range)              | Mean $\pm$ SE<br>(Range) | Mean $\pm$ SE<br>(Range) | Mean $\pm$ SE<br>(Range)                 | Mean $\pm$ SE<br>(Range)                 |
|                              |                      |                                         |                                        |                                       |                                       |                          |                          | Single Chiasma                           | Double Chiasmata                         |
| Without 1mM Mg <sup>2+</sup> | 136                  | 12.49 $\pm$ 0.59 <sup>a</sup><br>(4-22) | 6.54 $\pm$ 0.33 <sup>a</sup><br>(2-10) | 1.84 $\pm$ 0.20 <sup>c</sup><br>(0-5) | 1.60 $\pm$ 0.21 <sup>b</sup><br>(0-4) | 0.18 $\pm$ 0.08<br>(0-2) | 0.05 $\pm$ 0.04<br>(0-1) | 14.15 $\pm$ 0.42 <sup>c</sup><br>(8-19)  | 15.10 $\pm$ 0.53 <sup>c</sup><br>(8-23)  |
| With 1mM Mg <sup>2+</sup>    | 175                  | 11.14 $\pm$ 0.22 <sup>b</sup><br>(1-17) | 6.32 $\pm$ 0.13 <sup>a</sup><br>(2-11) | 2.11 $\pm$ 0.10 <sup>b</sup><br>(0-6) | 1.99 $\pm$ 0.08 <sup>a</sup><br>(0-4) | 0.15 $\pm$ 0.03<br>(0-2) | 0.08 $\pm$ 0.02<br>(0-1) | 15.31 $\pm$ 0.16 <sup>b</sup><br>(11-23) | 16.54 $\pm$ 0.18 <sup>b</sup><br>(11-23) |
| With Hoagland solution       | 104                  | 10.44 $\pm$ 0.27 <sup>b</sup><br>(1-17) | 5.74 $\pm$ 0.16 <sup>b</sup><br>(2-11) | 2.86 $\pm$ 0.13 <sup>a</sup><br>(0-5) | 2.01 $\pm$ 0.09 <sup>a</sup><br>(0-4) | 0.20 $\pm$ 0.04<br>(0-2) | 0.11 $\pm$ 0.03<br>(0-1) | 16.53 $\pm$ 0.21 <sup>a</sup><br>(12-23) | 18.05 $\pm$ 0.26 <sup>a</sup><br>(12-24) |
| <i>P</i> -value              |                      | 0.0000                                  | 0.0012                                 | 0.0000                                | 0.0008                                | 0.6642                   | 0.2913                   | 0.0000                                   | 0.0000                                   |

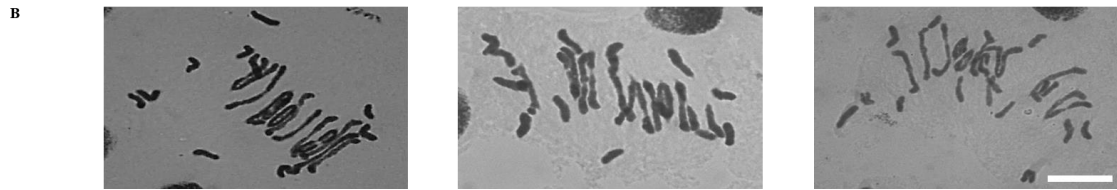

586

587 **FIGURE 2 | Effect of either 1mM Mg<sup>2+</sup> or Hoagland solution on homoeologous CO frequency of *T. aestivum***

588 **cv. Chinese Spring *Tazip4-B2 ph1b* mutant-*Ae. variabilis* hybrids. (A) Frequencies of univalents, bivalents,**

589 **trivalents, tetralents, pentavalents and chiasma frequency (single and double chiasmata) were scored at meiotic**

590 **metaphase I in *Tazip4-B2 ph1b* mutant-*Ae. variabilis* hybrids treated with either 1mM Mg<sup>2+</sup> or Hoagland solution.**

591 **Values in parenthesis indicate range of variation between cells. *P* < 0.05 indicates significant differences according**

592 **to LSD test. (B) Representative meiotic configurations of *Tazip4-B2 ph1b* mutant-*Ae. variabilis* hybrids. From**

593 **left to right: water alone, 1mM Mg<sup>2+</sup> treatment and Hoagland solution treatment. Bar: 20  $\mu$ m.**

594

595

596

597

598

599

600

601

602

603

604

605

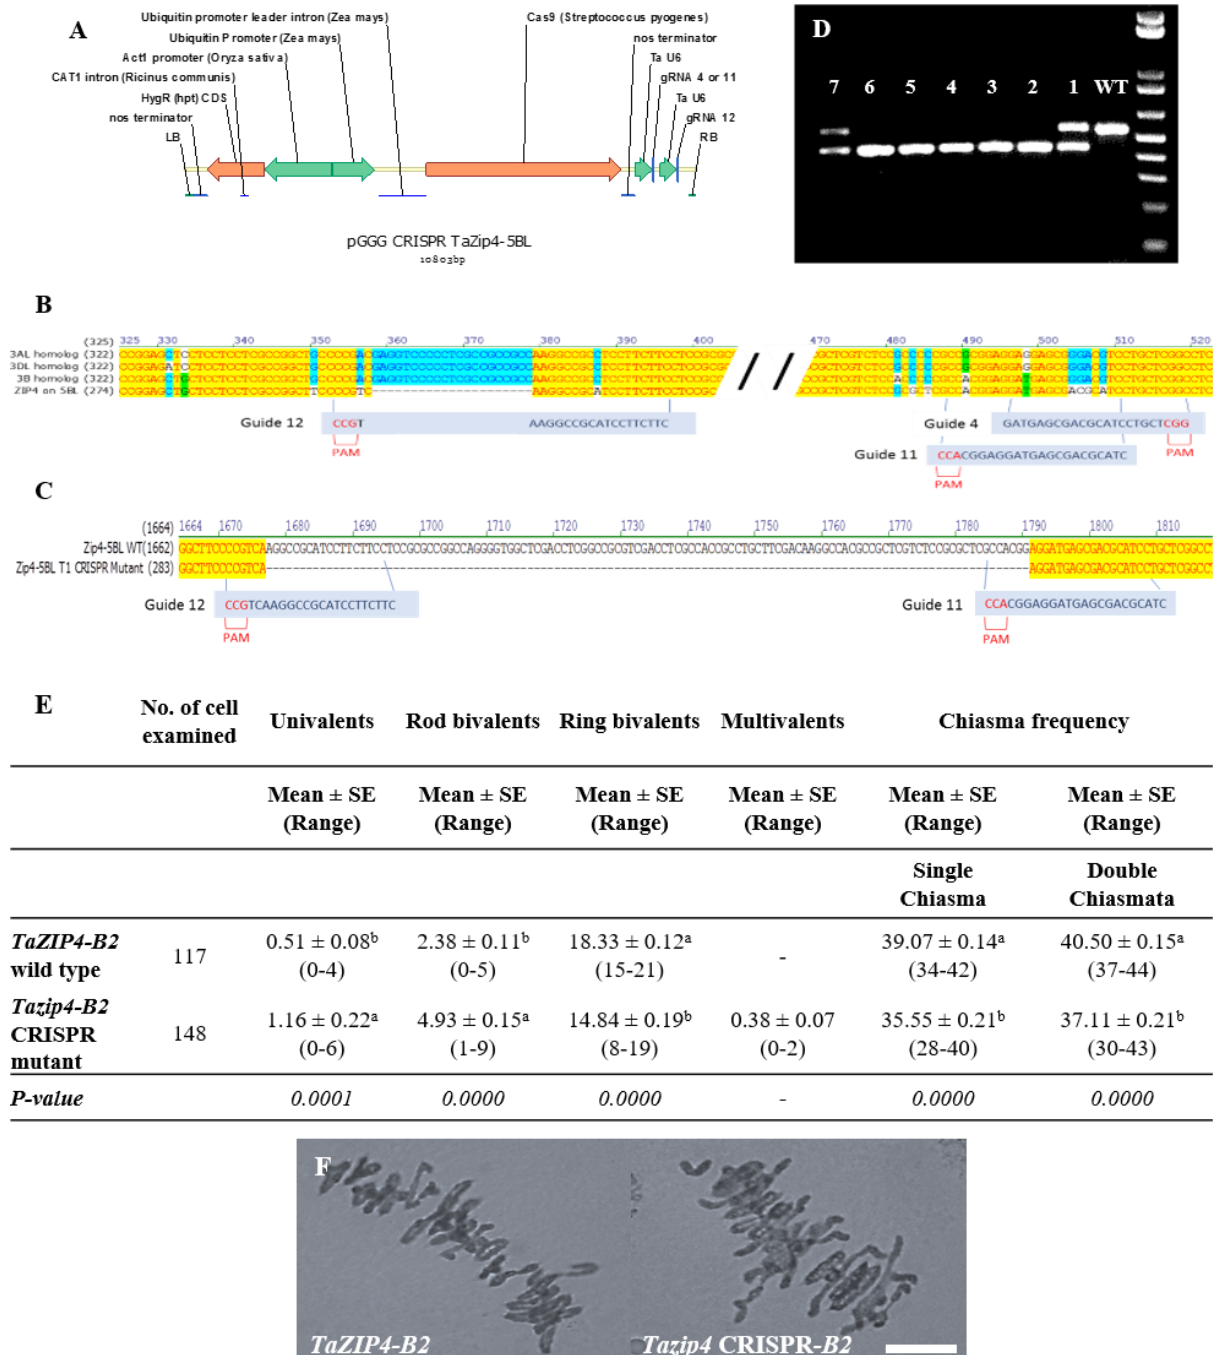

606

607 **FIGURE 3 | Development and phenotypic analysis of *TaZip4-B2* CRISPR mutants generated using RNA-**

608 **guided Cas9. (A)** Schematic of the structure of the pGGG CRISPR *TaZip4-B2* vector used in this study. **(B)**

609 Alignment of all copies of the *ZIP4* gene in wheat showing sequences and positions of the three sgRNAs designed

610 to specifically target *TaZIP4-B2* with their corresponding protospacer-adjacent motif (PAM). **(C)** Alignment of

611 *TaZIP4-B2* wild type and *TaZip4-B2* CRISPR mutant sequences showing the localization of the large deletion (115

612 bp) in *TaZIP4-B2*. **(D)** Genotypic assays for the identification of homozygous edited lines (lines: #2, #3, #4, #5

613 and #6) and heterozygous lines (lines: #1 and #7). Wild-type Fielder (WT) was used as a control line. **(E)**

614 Frequencies of univalents, bivalents and multivalents, and total chiasma frequency (single and double chiasmata)  
615 were scored at meiotic metaphase I in wild-type Fielder and *Tazip4-B2* CRISPR mutant. Values in parenthesis  
616 indicate range of variation between cells.  $P < 0.05$  indicates significant differences according to Dunn's test. **(F)**  
617 Representative meiotic metaphase I configurations of wild-type Fielder and *Tazip4-B2* CRISPR Fielder mutants.  
618 Left: wheat cv. Fielder and right: *Tazip4-B2* CRISPR mutant. Bar: 20  $\mu\text{m}$ .

619

620

621

622

623

624

625

626

627

628

629

630

631

632

633

634

635

636

637

638 **Supporting information**

639 **TABLE S1 | Genotypes and number of plants used for analysing the effect of a nutrient solution in**

640 **homoeologous CO frequency in wheat and its relative species.**

| Genotype                                                | Treatment                                                               | No. of plants |
|---------------------------------------------------------|-------------------------------------------------------------------------|---------------|
| <b>Absence of the <i>Ph1</i> locus</b>                  |                                                                         |               |
| CS- x Rye hybrids                                       | Hoagland Solution                                                       | 5             |
| CS- x Rye hybrids                                       | without Hoagland                                                        | 5             |
| CS- x Rye hybrids                                       | with Hoagland Solution - NH <sub>2</sub> H <sub>2</sub> PO <sub>4</sub> | 5             |
| CS- x Rye hybrids                                       | with Hoagland Solution - KNO <sub>3</sub>                               | 5             |
| CS- x Rye hybrids                                       | with Hoagland Solution - CaNO <sub>3</sub>                              | 5             |
| CS- x Rye hybrids                                       | with Hoagland Solution - MgSO <sub>4</sub>                              | 5             |
| CS- x Rye hybrids                                       | with Hoagland                                                           | 5             |
| CS- x Rye hybrids                                       | 1mM Magnesium                                                           | 5             |
| CS- x Rye hybrids                                       | 2mM Magnesium                                                           | 5             |
| CS- x <i>Ae. variabilis</i> hybrids                     | without 1mM Magnesium                                                   | 4             |
| CS- x <i>Ae. variabilis</i> hybrids                     | 1mM Magnesium                                                           | 5             |
| CS- x <i>Ae. variabilis</i> hybrids                     | Hoagland Solution                                                       | 3             |
| <b>Absence of the <i>TaZIP4</i> gene</b>                |                                                                         |               |
| <b>TILLING</b>                                          |                                                                         |               |
| Cad1691 x <i>Ae. variabilis</i> hybrids                 | without 1mM Magnesium                                                   | 5             |
| Cad1691 x <i>Ae. variabilis</i> hybrids                 | 1mM Magnesium                                                           | 4             |
| Cad1691 x <i>Ae. variabilis</i> hybrids                 | Hoagland Solution                                                       | 4             |
| Cad0348 x <i>Ae. variabilis</i> hybrids                 | without 1mM Magnesium                                                   | 5             |
| Cad0348 x <i>Ae. variabilis</i> hybrids                 | 1mM Magnesium                                                           | 4             |
| Cad0348 x <i>Ae. variabilis</i> hybrids                 | Hoagland Solution                                                       | 4             |
| <b>CRISPR/Cas9 system</b>                               |                                                                         |               |
| Wheat cv. Fielder carrying <i>TaZIP4-B2</i>             |                                                                         | 5             |
| Wheat cv. Fielder lacking <i>TaZIP4-B2</i>              |                                                                         | 5             |
| <i>TaZIP4-B2</i> - <i>Ae. variabilis</i> hybrids        |                                                                         | 4             |
| <i>Tazip4-B2</i> CRISPR - <i>Ae. variabilis</i> hybrids | without 1mM Magnesium                                                   | 4             |
| <i>Tazip4-B2</i> CRISPR - <i>Ae. variabilis</i> hybrids | 1mM Magnesium                                                           | 4             |
| <i>Tazip4-B2</i> CRISPR - <i>Ae. variabilis</i> hybrids | Hoagland Solution                                                       | 4             |

641

642

643

644

645

646

647

648 **TABLE S2 | Frequencies of univalents, bivalents, multivalents and chiasma frequency (single and double chiasmata) were scored at meiotic metaphase I in wheat**  
649 ***Tazip4-B2* CRISPR mutant - *Ae. variabilis* hybrids.** Values in parenthesis indicate range of variation between cells. P < 0.05 indicates significant differences according to  
650 Dunn's test.

|                                                | No. of cell examined | Univalents                           | Rod bivalents                      | Ring bivalents                    | Trivalents                        | Tetralents           | Pentavalents         | Chiasma frequency                    |                                      |
|------------------------------------------------|----------------------|--------------------------------------|------------------------------------|-----------------------------------|-----------------------------------|----------------------|----------------------|--------------------------------------|--------------------------------------|
|                                                |                      | Mean ± SE<br>(Range)                 | Mean ± SE<br>(Range)               | Mean ± SE<br>(Range)              | Mean ± SE<br>(Range)              | Mean ± SE<br>(Range) | Mean ± SE<br>(Range) | Mean ± SE<br>(Range)                 | Mean ± SE<br>(Range)                 |
|                                                |                      |                                      |                                    |                                   |                                   |                      |                      | Single Chiasma                       | Double Chiasmata                     |
| <b>Fielder x <i>Ae. variabilis</i> hybrids</b> | 172                  | 28.99 ± 0.27 <sup>a</sup><br>(20-35) | 2.61 ± 0.12 <sup>b</sup><br>(0-7)  | 0.05 ± 0.02 <sup>b</sup><br>(0-1) | 0.23 ± 0.04 <sup>b</sup><br>(0-2) | -                    | -                    | 3.15 ± 0.15 <sup>b</sup><br>(0-8)    | 3.41 ± 0.17 <sup>b</sup><br>(0-7)    |
| <b>CRISPR x <i>Ae. variabilis</i> hybrids</b>  | 124                  | 9.64 ± 0.27 <sup>b</sup><br>(3-17)   | 5.64 ± 0.17 <sup>a</sup><br>(2-10) | 1.94 ± 0.11 <sup>a</sup><br>(0-6) | 2.37 ± 0.11 <sup>a</sup><br>(0-6) | 0.52 ± 0.06<br>(0-3) | 0.20 ± 0.04<br>(0-2) | 16.66 ± 0.21 <sup>a</sup><br>(11-22) | 18.10 ± 0.23 <sup>a</sup><br>(12-24) |
| <b><i>P-value</i></b>                          |                      | 0.0000                               | 0.0000                             | 0.0000                            | 0.0000                            | -                    | -                    | 0.0000                               | 0.0000                               |

651

652

653

654 **FIGURE S1 | Chromosomal configurations with single chiasma or double chiasmata highlighted with**  
655 **arrows.** These structures marked by an arrow were counted as either single or double chiasmata in all analysed  
656 meiocytes. Both datasets are shown in all analysed genotypes. Bar: 20  $\mu$ m.

657

658

659

660

661

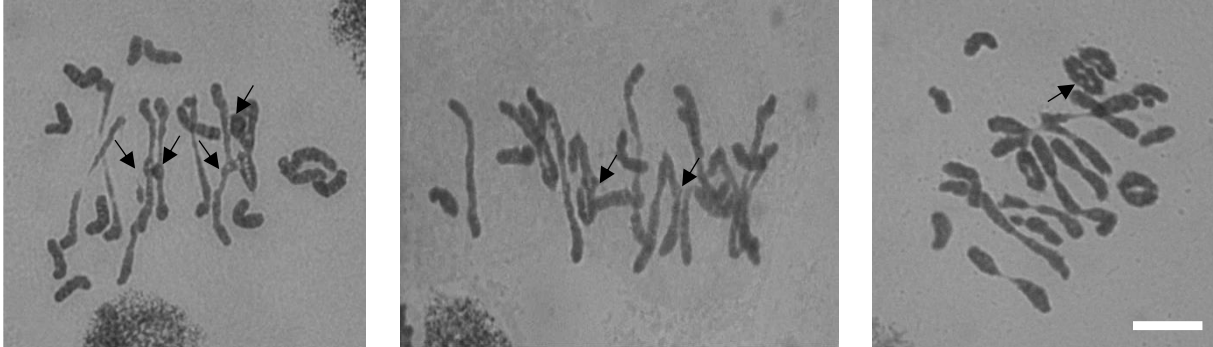

662

663

664

665

666

667

668

669

670

671

672

673

674

675

676

677

678

679

680

681 **FIGURE S2 | Representative meiotic configurations of *Triticum aestivum* cv. Cadenza (Cad1691-*Tazip4-B2***  
682 **mutant)-*Ae. variabilis* (A) and *Triticum aestivum* cv. Cadenza (Cad0348-*Tazip4-B2* mutant)-*Ae. variabilis***  
683 **(B) and wheat *Tazip4-B2* CRISPR mutant-*Ae. variabilis* mutant (c) hybrids. From left to right: water alone,**  
684 **treated with either 1mM Mg<sup>2+</sup> or Hoagland solution. Bar: 20 μm.**

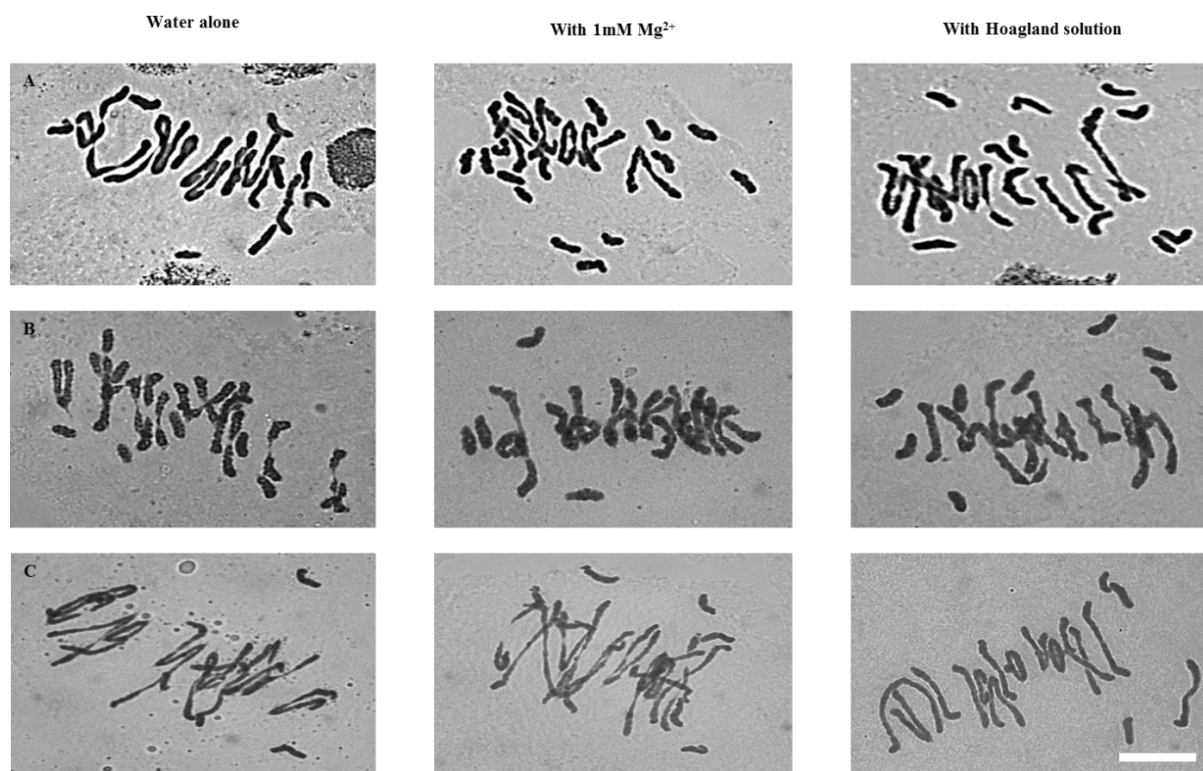

685
